# Supplementary material
Source: PubMed Central journal article supplement (PMC1317022)
Supplement: jbacter_187_24_8499__1.pdf [file jbacter_187_24_8499__1.pdf]

| <b>Gene</b>   | <b>Position</b> | <b>Length<br/>AA</b> | <b>Blastp<br/>Search/e<br/>value</b> | <b>Function</b>                          | <b>Comments</b>   | <b>Direct<br/>Comparison<br/>to T7, %<br/>A.A.<br/>Identity</b> |
|---------------|-----------------|----------------------|--------------------------------------|------------------------------------------|-------------------|-----------------------------------------------------------------|
| <b>0.3</b>    | 1114-<br>1623   | 169                  | K1-5/1e-40                           | Antirestriction                          |                   | 50                                                              |
| <b>orf49</b>  | 1623-<br>1772   | 49                   |                                      |                                          |                   |                                                                 |
| <b>orf55</b>  | 1840-<br>2007   | 55                   |                                      |                                          |                   |                                                                 |
| <b>0.6</b>    | 2011-<br>2208   | 65                   | $\Phi$ YeO3-12/<br>7.5               |                                          |                   |                                                                 |
| <b>1.0</b>    | 2566-<br>5247   | 893                  | T7 RNAP/ 0.0                         | RNAP                                     |                   | 64                                                              |
| <b>orf71</b>  | 5262-<br>5477   | 71                   |                                      |                                          |                   |                                                                 |
| <b>1.3</b>    | 6096-<br>7118   | 340                  | T7 Ligase/ 5e-<br>91                 | Ligase                                   |                   | 56                                                              |
| <b>1.6</b>    | 7230-<br>7487   | 85                   | T3 1.6/1e-07                         |                                          |                   | 33                                                              |
| <b>1.7</b>    | 7484-<br>7930   | 148                  | T7 1.7/2e-50                         |                                          |                   | 67                                                              |
| <b>orf75</b>  | 7942-<br>8169   | 75                   |                                      |                                          |                   |                                                                 |
| <b>1.8</b>    | 8250-<br>8348   | 32                   | T7 1.8/0.004                         |                                          |                   | 50                                                              |
| <b>2.0</b>    | 8345-<br>8503   | 52                   | T3 2.0/7e-12                         | Inhibits Host<br>RNAP                    |                   | 42                                                              |
| <b>2.5</b>    | 8624-<br>9259   | 211                  | $\Phi$ YeO3-12/<br>2e-35             | Single Strand<br>DNA binding<br>protein. |                   | 46                                                              |
| <b>3.0</b>    | 9259-<br>9711   | 150                  | $\Phi$ YeO3-12/<br>4e-49             | Endonuclease                             |                   | 52                                                              |
| <b>orf156</b> | 9708-<br>10178  | 156                  |                                      |                                          |                   |                                                                 |
| <b>3.5</b>    | 10172-<br>10630 | 152                  | $\Phi$ YeO3-12/<br>1e-57             | Lysozyme                                 |                   | 68                                                              |
| <b>orf71b</b> | 10655-<br>10870 | 71                   |                                      |                                          |                   |                                                                 |
| <b>4.0</b>    | 10939-<br>12699 | 586                  | $\Phi$ YeO3-12/<br>0.0               | Primase/Helicase                         |                   | 64                                                              |
| <b>5.0</b>    | 12921-<br>15690 | 723                  | $\Phi$ YeO3-12/<br>0.0               | DNAP                                     | Group 1<br>intron | 58                                                              |

|                      |                 |      |                                          |                        |                                        |
|----------------------|-----------------|------|------------------------------------------|------------------------|----------------------------------------|
|                      |                 |      |                                          |                        | inserted<br>between<br>14937-<br>15534 |
| <b><i>orf131</i></b> | 15019-<br>15414 | 131  | I-TsII<br>[Bacteriophage<br>Phi I]/4e-42 | Homing<br>endonuclease | 77%<br>identical to<br>I-TsII          |
| <b>5.5</b>           | 15690-<br>15938 | 82   | $\Phi$ YeO3-12/<br>1e-04                 |                        | 26                                     |
| <b>5.7</b>           | 15978-<br>16187 | 69   | T7/ 5e-26                                |                        | 77                                     |
| <b>6</b>             | 16184-<br>17050 | 288  | $\Phi$ YeO3-12/<br>2e-86                 | Exonuclease            | 52                                     |
| <b>6.5</b>           | 17261-<br>17533 | 90   | T7/ 3e-09                                |                        | 33                                     |
| <b>6.7</b>           | 17548-<br>17772 | 74   | T7/ 8e-08                                |                        | 49                                     |
| <b><i>orf122</i></b> | 17813-<br>18181 | 122  |                                          |                        |                                        |
| <b>7.3</b>           | 18174-<br>18422 | 82   | T3/8e-10                                 |                        | 41                                     |
| <b>8.0</b>           | 18434-<br>20002 | 522  | T7/ 0.0                                  | Head to Tail           | 67                                     |
| <b>9.0</b>           | 20111-<br>20995 | 294  | $\Phi$ A1122/2e-50                       | Scaffold               | 45                                     |
| <b>10.0</b>          | 21136-<br>22179 | 347  | gh-1/1e-122                              | Capsid                 |                                        |
| <b>11.0</b>          | 22373-<br>22939 | 188  | gh-1/9e-42                               | Tail Tube              | 47                                     |
| <b>12.0</b>          | 22939-<br>25296 | 785  | gh-1/0.0                                 | Tail Tube              | 52                                     |
| <b>13.0</b>          | 25373-<br>25843 | 156  | T3/8e-24                                 | Internal Virion        | 47                                     |
| <b>14.0</b>          | 25828-<br>26415 | 195  | gh-1/5e-43                               | Internal Virion        | 40                                     |
| <b>15.0</b>          | 26427-<br>28709 | 760  | T7/0.0                                   | Internal Virion        | 45                                     |
| <b>16.0</b>          | 28714-<br>32601 | 1295 | T7/0.0                                   | Internal Virion        | 51                                     |
| <b>17.0</b>          | 32666-<br>35860 | 1064 | K1F<br>Endosialidase                     | Tail Protein           | Sequence<br>previously<br>reported.    |
| <b>17.5</b>          | 35994-<br>36188 | 64   | Ye03-12/2e-16                            | Lysis                  | 63                                     |

|                     |                 |     |              |            |    |
|---------------------|-----------------|-----|--------------|------------|----|
| <b><i>18</i></b>    | 36185-<br>36448 | 87  | Gh/2e-12     | maturation | 44 |
| <b><i>18.5</i></b>  | 36551-<br>37000 | 149 | ΦA1122/2e-34 | lysis      |    |
| <b><i>19.0</i></b>  | 37030-<br>38757 | 575 | gh-1/0.0     | maturation | 66 |
| <b><i>orf34</i></b> | 38787-<br>38891 | 34  |              |            |    |

Table 1. Open reading frames in K1F.
